# Supplementary material for: Sulfated polysaccharides from Enteromorpha prolifera suppress SREBP-2 and HMG-CoA reductase expression and attenuate non-alcoholic fatty liver disease induced by a high-fat diet
Source: Royal Society of Chemistry journal article supplement (doi:10.1039/c7fo00103g), 2017-01-01

Supplementary material

Fig. S1. Effect of EP on fecal bile acid of rats from ND, HD, HST20, HEP200 and HEP400 groups. Rats were fed with ND or HD for 5 weeks and with indicated treatment. Rats fecal material was collected for the last 3 day of the experiment and determined by Total Bile Acids Assay Kit.

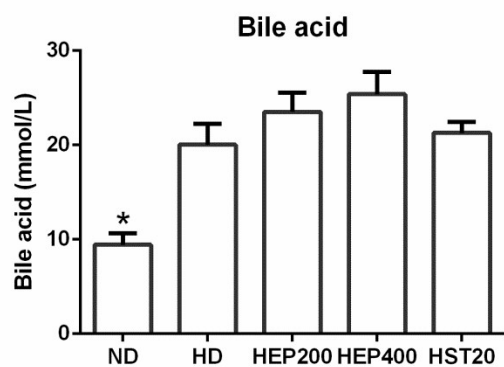

Supplement: c7fo00103g1.pdf [file c7fo00103g1.pdf]
